# Supplementary material for: Association between total water intake and dietary intake of pregnant and breastfeeding women in China: a cross-sectional survey
Source: Springer Nature journal article supplement (doi:10.1186/s12884-019-2301-z), 2019-05-15
Supplement: MOESM1 [file 16726420]

Table S1. General characteristics of breastfeeding women grouped by feeding modes <sup>a</sup>

| Variables                             | Breastfeeding | Mixed feeding | <i>P</i> <sup>c</sup> |
|---------------------------------------|---------------|---------------|-----------------------|
| sample size                           | 79            | 71            |                       |
| Age (years)                           | 31.4(3.7)     | 32.5(4.5)     | 0.315                 |
| BMI (kg/m <sup>2</sup> ) <sup>b</sup> | 22.7(3.9)     | 23.4(3.43)    | 0.431                 |
| <b>BMI classification</b>             |               |               | 0.333                 |
| Underweight                           | 7(9)          | 0(0)          |                       |
| Normal                                | 48(61)        | 44(62)        |                       |
| Overweight                            | 19(24)        | 20(28)        |                       |
| Obesity                               | 5(6)          | 7(10)         |                       |
| <b>Working Status</b>                 |               |               | 0.358                 |
| Housewife                             | 5(6)          | 7(10)         |                       |
| Government employment                 | 28(35)        | 28(40)        |                       |
| Professionals                         | 32(41)        | 24(33)        |                       |
| Service                               | 14(18)        | 7(10)         |                       |
| Other                                 | 0(0)          | 4(7)          |                       |
| <b>Education Level</b>                |               |               | 0.158                 |
| High School or below                  | 6(8)          | 5(7)          |                       |
| College                               | 32(41)        | 43(61)        |                       |
| Postgraduate or up                    | 41(52)        | 23(32)        |                       |
| <b>Physical level</b>                 |               |               | 0.494                 |
| Low                                   | 38(48)        | 44(62)        |                       |
| Middle                                | 15(19)        | 10(14)        |                       |
| High                                  | 26(33)        | 17(24)        |                       |

<sup>a</sup> Continuous data were presented as mean (SD) and categorized variables (including BMI classification, working status, educational level, and physical level) as n (%). <sup>b</sup> BMI was calculated with current weight and height. <sup>c</sup> *P* was obtained from the independent sample T test for continuous variables (age), and chi-square test for categorized variables (BMI classification, working status, educational level, and physical level).

Table S2. Total water and water from different sources intake of the pregnant women categorized by body mass index, working status, educational level, physical level, and gestational weeks <sup>d</sup>

| Group                     | Total   | Total Water Intake |                       | Plain Water     |                       | Water from beverages |                       | Water from food |                       |
|---------------------------|---------|--------------------|-----------------------|-----------------|-----------------------|----------------------|-----------------------|-----------------|-----------------------|
|                           |         | Median(P25-P75)    | <i>P</i> <sup>e</sup> | Median(P25-P75) | <i>P</i> <sup>e</sup> | Median(P25-P75)      | <i>P</i> <sup>e</sup> | Median(P25-P75) | <i>P</i> <sup>e</sup> |
| <b>BMI classification</b> |         |                    | 0.459                 |                 | 0.276                 |                      | 0.665                 |                 | 0.829                 |
| Underweight               | 25(13)  | 2621(2027-3126)    |                       | 1200(750-1500)  |                       | 193(90-355)          |                       | 1264(836-1444)  |                       |
| Normal                    | 138(69) | 2539(1993-3156)    |                       | 1000(800-1500)  |                       | 178(98-303)          |                       | 1135(884-1492)  |                       |
| Overweight                | 21(11)  | 2653(2137-3635)    |                       | 1500(1000-1800) |                       | 176(83-411)          |                       | 1132(895-1349)  |                       |
| Obesity                   | 12(6)   | 2481(1478-3465)    |                       | 1300(800-2000)  |                       | 145(54-370)          |                       | 904(535-1311)   |                       |
| <b>Working Status</b>     |         |                    | 0.452                 |                 | 0.848                 |                      | 0.300                 |                 | 0.347                 |
| Housewife                 | 59(30)  | 2539(2035-3002)    |                       | 1200(600-1500)  |                       | 179(84-294)          |                       | 1140(812-1412)  |                       |
| Government employment     | 28(14)  | 2493(1994-3422)    |                       | 1000(925-1575)  |                       | 143(75-284)          |                       | 1041(743-1358)  |                       |
| Professionals             | 53(27)  | 2681(2055-3322)    |                       | 1000(860-1500)  |                       | 204(124-329)         |                       | 1221(884-1559)  |                       |
| Service                   | 37(19)  | 2395(1827-2985)    |                       | 1000(650-1500)  |                       | 176(99-345)          |                       | 1059(902-1379)  |                       |
| Other                     | 18(9)   | 2707(1801-3389)    |                       | 1000(650-1850)  |                       | 124(62-329)          |                       | 1231(916-1491)  |                       |
| <b>Education Level</b>    |         |                    | 0.236                 |                 | 0.364                 |                      | 0.886                 |                 | 0.373                 |
| High School or below      | 56(28)  | 2500(1780-3002)    |                       | 1000(550-1500)  |                       | 159(90-283)          |                       | 1065(800-1343)  |                       |
| College                   | 121(61) | 2611(2005-3252)    |                       | 1000(800-1500)  |                       | 186(96-314)          |                       | 1140(915-1455)  |                       |
| Postgraduate or up        | 23(11)  | 2632(2046-3926)    |                       | 1100(1000-1500) |                       | 133(60-367)          |                       | 1220(901-1819)  |                       |
| <b>Physical level</b>     |         |                    | 0.111                 |                 | 0.098                 |                      | 0.894                 |                 | 0.875                 |
| Low                       | 52(26)  | 2736(2310-3501)    |                       | 1200(1000-1550) |                       | 179(79-357)          |                       | 1111(908-1447)  |                       |
| Middle                    | 100(50) | 2460(1967-3071)    |                       | 1000(650-1500)  |                       | 178(115-306)         |                       | 1158(868-1393)  |                       |
| High                      | 48(24)  | 2656(1831-3078)    |                       | 1000(800-1750)  |                       | 158(84-288)          |                       | 1077(770-1408)  |                       |
| <b>Gestational week</b>   |         |                    | 0.282                 |                 | 0.527                 |                      | 0.375                 |                 | 0.041                 |
| First trimester           | 106(53) | 2539(1827-3036)    |                       | 1000(800-1500)  |                       | 168(80-303)          |                       | 1086(765-1367)  |                       |
| Second trimester          | 65(33)  | 2632(2040-3147)    |                       | 1200(800-1600)  |                       | 179(88-309)          |                       | 1172(971-1413)  |                       |
| Third trimester           | 29(14)  | 2544(2181-3858)    |                       | 1200(1000-1500) |                       | 217(123-367)         |                       | 1232(901-1780)  |                       |

<sup>d</sup> The categorized variables represented as number and percentage; all values of water intake variables represented median and percentile 25th and 75th; <sup>e</sup> P Value obtained from the

Kruskal-Wallis H (K) test indicated the significant difference between different groups.

Table S3. Total water and water from different sources intake of the breastfeeding women categorized by body mass index, working status, educational level, physical level, and

Feeding modes <sup>f</sup>

| Group                     | Total  | Total Water Intake |                       | Plain Water     |                       | Water from beverages |                       | Water from food |                       |
|---------------------------|--------|--------------------|-----------------------|-----------------|-----------------------|----------------------|-----------------------|-----------------|-----------------------|
|                           |        | Median(P25-P75)    | <i>P</i> <sup>g</sup> | Median(P25-P75) | <i>P</i> <sup>g</sup> | Median(P25-P75)      | <i>P</i> <sup>g</sup> | Median(P25-P75) | <i>P</i> <sup>g</sup> |
| <b>BMI classification</b> |        |                    | 0.976                 |                 | 0.524                 |                      | 0.464                 |                 | 0.771                 |
| Underweight               | 7(5)   | 3426(2283-4349)    |                       | 1750(950-2250)  |                       | 206(131-541)         |                       | 1294(848-1730)  |                       |
| Normal                    | 91(61) | 2889(2446-3592)    |                       | 1200(800-1800)  |                       | 225(69-360)          |                       | 1308(1001-1800) |                       |
| Overweight                | 39(26) | 2963(2164-4494)    |                       | 1375(725-2000)  |                       | 264(133-405)         |                       | 1326(1027-1867) |                       |
| Obesity                   | 12(8)  | 3021(2272-4363)    |                       | 1000(470-2000)  |                       | 368(187-518)         |                       | 1390(1137-2157) |                       |
| <b>Working Status</b>     |        |                    | 0.493                 |                 | 0.557                 |                      | 0.600                 |                 | 0.202                 |
| Housewife                 | 12(8)  | 2806(2162-3785)    |                       | 1500(300-2000)  |                       | 200(42-367)          |                       | 1278(1057-1566) |                       |
| Government employment     | 61(40) | 3043(2544-4401)    |                       | 1500(800-2000)  |                       | 256(116-384)         |                       | 1470(1108-1885) |                       |
| Professionals             | 55(36) | 2889(2207-3679)    |                       | 1000(800-1800)  |                       | 303(116-476)         |                       | 1216(945-1848)  |                       |
| Service                   | 22(15) | 2880(2356-3774)    |                       | 1063(775-2000)  |                       | 177(41-384)          |                       | 1268(906-1760)  |                       |
| <b>Education Level</b>    |        |                    | 0.491                 |                 | 0.347                 |                      | 0.199                 |                 | 0.739                 |
| High School or below      | 11(7)  | 2765(1804-3082)    |                       | 1000(400-1500)  |                       | 42(36-244)           |                       | 1522(1188-1774) |                       |
| College                   | 74(49) | 2930(2312-4053)    |                       | 1500(750-2000)  |                       | 239(120-431)         |                       | 1281(982-1802)  |                       |
| Postgraduate or up        | 65(44) | 3004(2501-4119)    |                       | 1200(900-2000)  |                       | 282(114-402)         |                       | 1405(1026-1872) |                       |
| <b>Physical level</b>     |        |                    | 0.851                 |                 | 0.682                 |                      | 0.171                 |                 | 0.743                 |
| Low                       | 82(55) | 2812(2273-4329)    |                       | 1200(800-2000)  |                       | 209(69-367)          |                       | 1305(1112-1809) |                       |
| Middle                    | 24(16) | 2967(2547-3700)    |                       | 1500(850-1800)  |                       | 275(174-511)         |                       | 1196(943-1813)  |                       |
| High                      | 44(29) | 2920(2294-3345)    |                       | 1000(800-1875)  |                       | 294(118-454)         |                       | 1328(992-1885)  |                       |
| <b>Feeding modes</b>      |        |                    | 0.297                 |                 | 0.345                 |                      | 0.406                 |                 | 0.831                 |
| Breastfeeding             | 79(52) | 2809(2313-3610)    |                       | 1000(800-1900)  |                       | 225(73-356)          |                       | 1296(1026-1821) |                       |
| Mixed feeding             | 71(48) | 3037(2431-4148)    |                       | 1500(800-2000)  |                       | 277(117-438)         |                       | 1312(1015-1848) |                       |

<sup>f</sup>The categorized variables represented as number and percentage; all values of water intake variables represented median and percentile 25th and 75th; <sup>g</sup>*P* Value obtained from the

Kruskal-Wallis H (K) test indicated the significant difference between different groups.

Table S4. The association between water intake from different sources and dietary characteristics among pregnant women

without adjustment for covariates

|                                           | Total water       |       | Plain water       |              | Water from beverages |              | Water from food   |              |
|-------------------------------------------|-------------------|-------|-------------------|--------------|----------------------|--------------|-------------------|--------------|
|                                           | $\beta(95\%CI)^i$ | $P^j$ | $\beta(95\%CI)^i$ | $P^j$        | $\beta(95\%CI)^i$    | $P^j$        | $\beta(95\%CI)^i$ | $P^j$        |
| Energy (100kcal) <sup>h</sup>             | 67(48,86)         | <0.01 | 22(7,36)          | <0.01        | 12(8,15)             | <0.01        | 36(27,46)         | <0.01        |
| Protein(5g) <sup>h</sup>                  | 74(55,92)         | <0.01 | 26(11,40)         | <0.01        | 11(7,14)             | <0.01        | 40(31,49)         | <0.01        |
| Fat(5g) <sup>h</sup>                      | 65(42,89)         | <0.01 | 30(13,47)         | <0.01        | 13(9,18)             | <0.01        | 23(10,35)         | <0.01        |
| Carbohydrate(5g) <sup>h</sup>             | 22(15,28)         | <0.01 | 5(0,10)           | 0.058        | 4(2,5)               | <0.01        | 15(12,18)         | <0.01        |
| Fiber(5g) <sup>h</sup>                    | 356(287,425)      | <0.01 | 65(6,125)         | <b>0.031</b> | 35(19,50)            | <0.01        | 271(249,292)      | <0.01        |
| Na <sup>+</sup> (100mg) <sup>h</sup>      | 51(31,71)         | <0.01 | 1(6,35)           | <0.01        | 9(5,13)              | <0.01        | 22(12,33)         | <0.01        |
| Energy from protein(5%) <sup>h</sup>      | 93(439,0)         | <0.01 | 135(8,263)        | <b>0.037</b> | 5(-32,41)            | 0.804        | 116(21,211)       | <b>0.016</b> |
| Energy from fat(5%) <sup>h</sup>          | 39(-60,138)       | 0.441 | 71(3,138)         | <b>0.040</b> | 22(3,41)             | <b>0.022</b> | -63(-113,-13)     | <b>0.014</b> |
| Energy from carbohydrate(5%) <sup>h</sup> | -37(-105,32)      | 0.292 | -52(-98,-6)       | <b>0.028</b> | -12(-25,1)           | 0.074        | 31(-3,66)         | 0.077        |
| Energy (100kcal) <sup>h</sup>             | 67(48,86)         | <0.01 | 22(7,36)          | <0.01        | 12(8,15)             | <0.01        | 36(27,46)         | <0.01        |

<sup>h</sup> The simple liner regression models were established with water intake from different sources as dependent variables and dietary characteristics as independent variables. <sup>i</sup> All values represented  $\beta$ s (95%CI) which were associated with units of measurement given in parentheses for each independent variable (for example, when there was a 100 kcal/day increase in energy intake, TWI would increase by 67mL, plain water intake 22 mL, water intake from beverages 12mL, and water intake from foods 36mL); <sup>j</sup> P Values obtained from the simple linear regression analyses indicated the significance of the association of each independent variable with all water variables.

Table S5. The association between water intake from different sources and dietary characteristics among breastfeeding women without adjustment for covariates

|                                            | Total water       |       | Plain water       |       | Water from beverages |              | Water from food   |       |
|--------------------------------------------|-------------------|-------|-------------------|-------|----------------------|--------------|-------------------|-------|
|                                            | $\beta(95\%CI)^l$ | $P^m$ | $\beta(95\%CI)^l$ | $P^m$ | $\beta(95\%CI)^l$    | $P^m$        | $\beta(95\%CI)^l$ | $P^m$ |
| Energy (100kcal) <sup>k</sup>              | 55(35,75)         | <0.01 | -4(-21,13)        | 0.642 | 12(8,17)             | <0.01        | 46(37,56)         | <0.01 |
| Protein(5g) <sup>k</sup>                   | 54(35,72)         | <0.01 | 2(-14,18)         | 0.766 | 10(6,14)             | <0.01        | 41(32,50)         | <0.01 |
| Fat(5g) <sup>k</sup>                       | 58(31,85)         | <0.01 | -4(-27,18)        | 0.717 | 18(12,23)            | <0.01        | 44(30,59)         | <0.01 |
| Carbohydrate(5g) <sup>k</sup>              | 16(10,23)         | <0.01 | -2(-7,4)          | 0.502 | 3(2,5)               | <0.01        | 15(12,18)         | <0.01 |
| Fiber(5g) <sup>k</sup>                     | 209(141,277)      | <0.01 | -5(-65,55)        | 0.872 | 24(8,41)             | <0.01        | 189(162,217)      | <0.01 |
| Na <sup>+</sup> (100mg) <sup>k</sup>       | 54(27,81)         | <0.01 | -1(-36,7)         | 0.191 | 16(11,22)            | <0.01        | 52(39,65)         | <0.01 |
| Energy from protein (5%) <sup>k</sup>      | 199(-139,537)     | 0.247 | 159(-102,419)     | 0.230 | -25(-100,50)         | 0.514        | 64(-127,256)      | 0.508 |
| Energy from fat (5%) <sup>k</sup>          | -17(-181,146)     | 0.833 | -9(-135,117)      | 0.885 | 43(8,79)             | <b>0.016</b> | -52(-144,40)      | 0.269 |
| Energy from carbohydrate (5%) <sup>k</sup> | 7(-107,122)       | 0.900 | -7(-95,82)        | 0.879 | -21(-46,4)           | 0.103        | 35(-30,99)        | 0.287 |

<sup>k</sup> The simple linear regression models were established with water intake from different sources as dependent variables and dietary characteristics as independent variables. <sup>l</sup> All values represented  $\beta$ s (95%CI) which were associated with units of measurement given in parentheses for each independent variable (for example, when there was a 100 kcal/day increase in energy intake, TWI would increase by 55mL, water intake from beverages 12mL, and water intake from foods 46mL); <sup>m</sup> P Values obtained from the simple linear regression analyses indicated the significance of the association of each independent variable with all water variables.
